# Supplementary material for: Biological Characteristics and Osteogenic Differentiation of Ovine Bone Marrow Derived Mesenchymal Stem Cells Stimulated with FGF-2 and BMP-2
Source: PubMed Central journal article supplement (PMC7766718; doi:10.3390/ijms21249726), 2020-12-20
Supplement: ijms-21-09726-s001.pdf [file ijms-21-09726-s001.pdf]

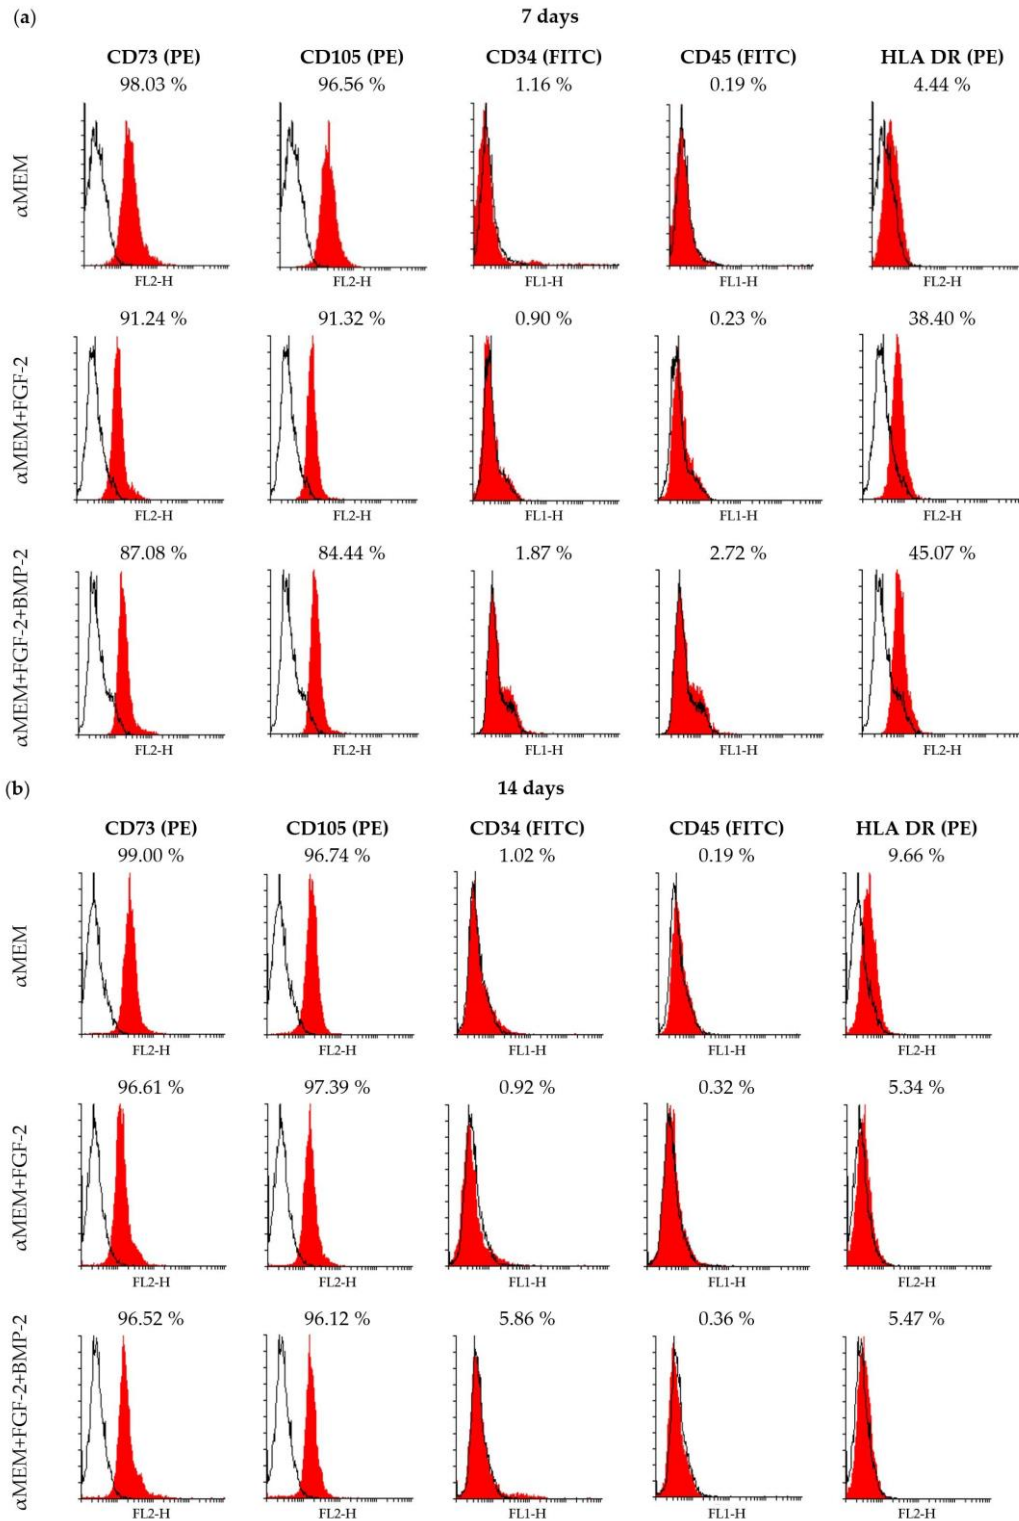

**Figure S1.** Flow cytometry analysis of BM-MSCs cultured in the control medium  $\alpha$ MEM and in a medium supplemented with BMP-2 and/or FGF-2 for 7 and 14 days (a, b). Cell surface markers of BM-MSCs are similar in all culture conditions and incubation times.

**Table S1.** Antibodies used for flow cytometry and immunofluorescence.

| <b>Antigen</b>                     | <b>Antibody clone</b> | <b>Company</b>                  | <b>Dilution</b> |
|------------------------------------|-----------------------|---------------------------------|-----------------|
| <b>Direct flow cytometry</b>       |                       |                                 |                 |
| CD 73 PE                           | TY/23                 | BD Pharmingen, California, USA  | 1:5             |
| CD 105 PE                          | MJ7/18                | BD Pharmingen, California, USA  | 1:5             |
| HLA-DR PE                          | 37.68                 | Novus Biologicals, Abingdon, UK | 1:250           |
| Isotype control PE                 |                       | Abcam, Cambridge, UK            | 1:50            |
| <b>Indirect flow cytometry</b>     |                       |                                 |                 |
| CD34                               | EP373Y                | Abcam, Cambridge, UK            | 1:250           |
| CD45                               | CACTB51A              | Novus Biologicals, Abingdon, UK | 1:250           |
| Goat Anti-Rabbit FITC              |                       | Abcam, Cambridge, UK            | 1:500           |
| Goat Anti-Mouse FITC               |                       | Abcam, Cambridge, UK            | 1:500           |
| <b>Immunofluorescence staining</b> |                       |                                 |                 |
| Anti-Collagen I                    | Rabbit polyclonal     | Abcam, Cambridge, UK            | 1:100           |
| Anti-Osteocalcin                   | OCG3                  | Abcam, Cambridge, UK            | 1:100           |

**Table S2.** Primers used in PCR assays.

| <b>Gene</b>            | <b>Primer Sequences (5'-3')</b>                      | <b>Fragment size (bp)</b> | <b>Cycles</b> | <b>T<sub>m</sub> (°C)</b> |
|------------------------|------------------------------------------------------|---------------------------|---------------|---------------------------|
| <b>RT-PCR assay</b>    |                                                      |                           |               |                           |
| <i>GAPDH</i>           | F: CCTGCACCACCAACTGCTTG<br>R: TTGAGCTCAGGGATGACCTTG  | 224                       | 30            | 55                        |
| <i>CD90</i>            | F: AGGACACAGGAAGCCACAAG<br>R: CCCTCACTCTCCATCAGGTC   | 311                       | 30            | 56                        |
| <b>qRT-PCR assay</b>   |                                                      |                           |               |                           |
| <i>GAPDH</i>           | F: GCAAGTTCCACGGCACAG<br>R: GGTTACGCCCCATCACAA       | 249                       | 40            | 58                        |
| <i>BMP-2</i>           | F: ATGGTTTCGTGGTGGAGGTAG<br>R: ACTTGAGGCGTTTCCGCTGTT | 210                       | 40            | 58                        |
| <i>Runx2</i>           | F: TCGCCTCACAAACAACCA<br>R: AGGGACCTGCGGAGATTA       | 102                       | 40            | 53                        |
| <i>Osterix</i>         | F: CAGCGGCGTGCAGTAAAT<br>R: CTGGGAACGAGTGGGAAAA      | 240                       | 40            | 56                        |
| <i>Collagen type I</i> | F: CAAGAAGAAGACATCCCACC<br>R: AGATCACGTCATCGCACA     | 133                       | 40            | 55                        |
| <i>Osteocalcin</i>     | F: AGATGCAAAGCCTGGTGATGC<br>R: CTCCTGGAAGCCGATGTGGT  | 211                       | 40            | 60                        |
| <i>Osteopontin</i>     | F: TCCCACTGACATTCCAACAA<br>R: CTGTGGCATCTGGACTCTCA   |                           | 40            | 60                        |
